# Supplementary material
Source: publisher site journal article supplement (https://www.dovepress.com/article/540340)
Supplement: Supplementary file 1 [file Supplementary%20materials.pdf]

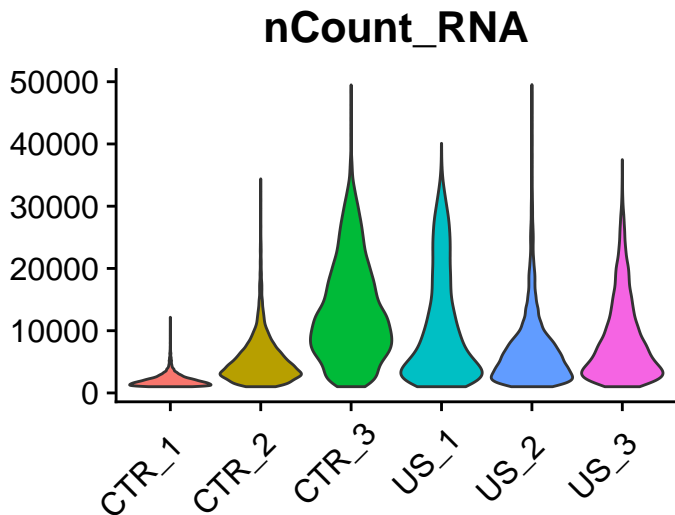

Fig S1: Distribution of total transcript counts (nCount\_RNA) across control and ureteral stricture tissues in scRNA-seq

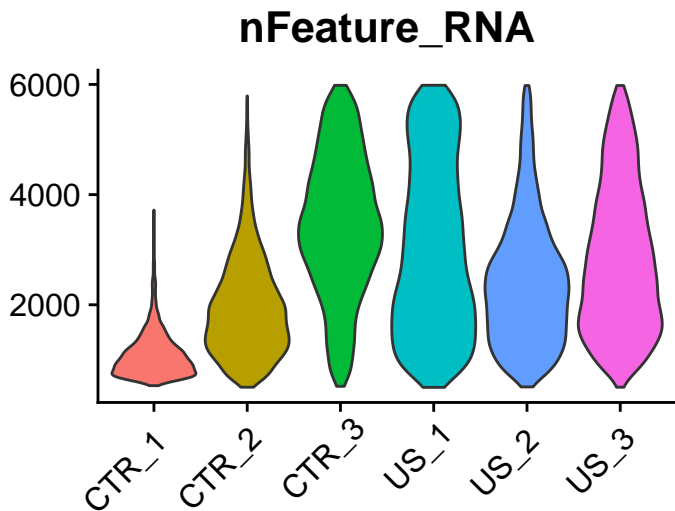

Fig S2: Distribution of detected gene features (nFeature\_RNA) in control and ureteral stricture tissues

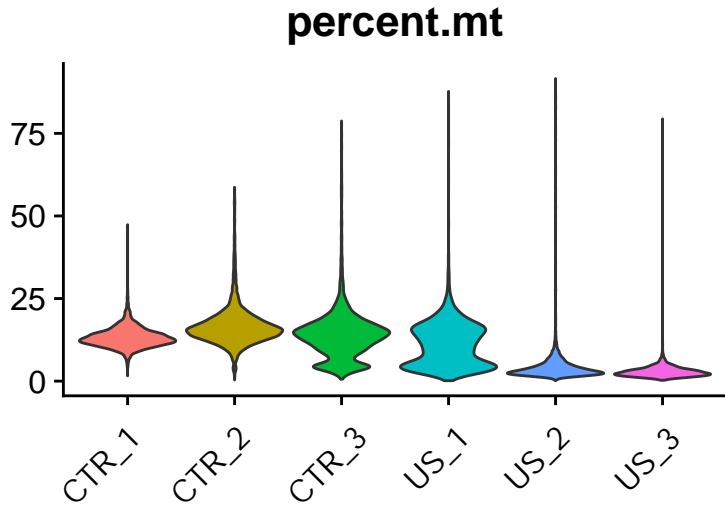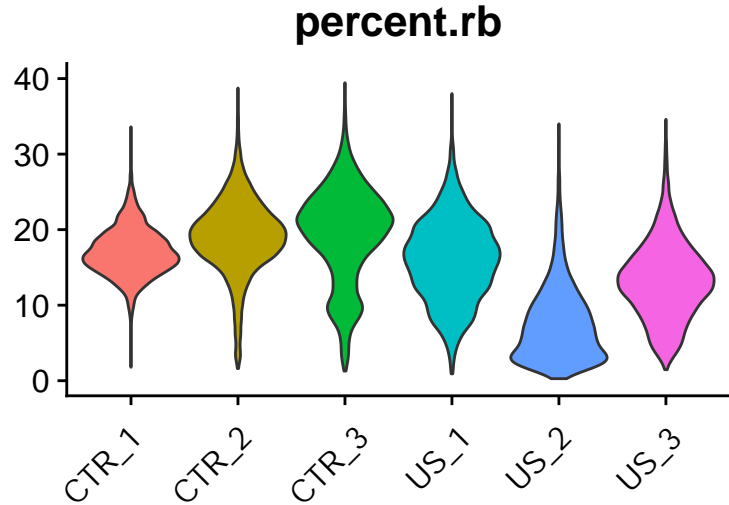

Fig S3: IDistribution of mitochondrial and ribosomal gene expression

percentages in control and stricture ureter samples

**Supplementary Table S1: Reorganized Gene Marker Table**

| Cell Type                     | Gene Marker   | Reference        |
|-------------------------------|---------------|------------------|
| Epithelial cell               | KRT18         | [ PMID ]24056875 |
| Basal cell                    | KRT5          | [ PMID ]24056875 |
| Intermediate cell, basal cell | KRT13         | [ PMID ]24056875 |
| Basal cell                    | KRT17         | [ PMID ]24056875 |
| Basal cell                    | MT1E          | [ PMID ]16600086 |
| Epithelial cell               | UPK1A         | [ PMID ]24056875 |
| Basal cell                    | S100A8        | [ PMID ]31345374 |
| Umbrella cell                 | UPK2          | [ PMID ]24056875 |
| Umbrella cell                 | UPK3A         | [ PMID ]24056875 |
| intermediate cell             | FABP5         | [ PMID ]32311026 |
| Fibroblast                    | COL1A1        | [ PMID ]28893418 |
| Fibroblast                    | COL3A1        | [ PMID ]35649411 |
| Fibroblast                    | NRG1          | [ PMID ]36706185 |
| Fibroblast                    | $\alpha$ -SMA | [ PMID ]27825850 |
| Myofibroblasts                | TGFBI         | [ PMID ]37406975 |
| Fibroblast                    | POSTN         | [ PMID ]38370408 |
| Fibroblast                    | IGFBP2        | [ PMID ]26559475 |
| Fibroblast                    | CXCL12        | [ PMID ]38393304 |
| endothelial cell              | GJA5          | [ PMID ]29104646 |
| endothelial cell              | ACKR1         | [ PMID ]35664061 |
| endothelial cell              | HEY1          | [ PMID ]38166414 |
| Macrophage                    | CD86          | [ PMID ]24157331 |
| Macrophage                    | CD68          | [ PMID ]31131759 |
| Macrophage                    | CD163         | [ PMID ]32397365 |
| Macrophage                    | APOE          | [ PMID ]34019793 |
| Macrophage                    | MMP19         | [ PMID ]36158683 |
| Macrophage                    | CD11b         | [ PMID ]34630381 |
| T cell                        | CD3D          | [ PMID ]27494091 |
| T cell                        | CD3E          | [ PMID ]36389741 |

**Supplementary Table S2: Detailed list of antibodies:**

| <b>Antibody</b> | <b>Company</b>                                 | <b>Account number</b> |
|-----------------|------------------------------------------------|-----------------------|
| Pan-CK          | Shanghai Huilan Biological Technology Co., Ltd | HL06815               |
| Vimentin        | Shanghai Huilan Biological Technology Co., Ltd | ABB5134               |
| CD31            | Shanghai Huilan Biological Technology Co., Ltd | HL18207               |
| CD68            | Shanghai Huilan Biological Technology Co., Ltd | HL18057               |
| CD163           | Shanghai Huilan Biological Technology Co., Ltd | ABB00024              |
| CD3             | Shanghai Huilan Biological Technology Co., Ltd | ABB00013              |
| CD86            | Signalway Antibody                             | C48763                |
| NRG1            | Signalway Antibody                             | C43946                |
| CXCL1           | Signalway Antibody                             | C43679                |
| $\alpha$ -SMA   | Signalway Antibody                             | C41550                |
| S100A8          | ZEN-BIOSCIENCE                                 | R30007                |
| MMP19           | ZEN-BIOSCIENCE                                 | 860629                |
